# Supplementary material for: In situ observation of the sodiation process in CuO nanowires
Source: Royal Society of Chemistry journal article supplement (doi:10.1039/c5cc03734d), 2015-01-01
Supplement: c5cc03734d2.pdf [file c5cc03734d2.pdf]

## ***In Situ* Observation of Sodiation Process in CuO Nanowires**

Huihui Liu,<sup>‡a</sup> Fan Cao,<sup>‡a</sup> He Zheng,<sup>‡a</sup> Huaping Sheng,<sup>a</sup> Lei Li,<sup>a</sup> Shujing Wu,<sup>a</sup> Chun Liu,<sup>a</sup> and  
Jianbo Wang<sup>\*a</sup>

*<sup>a</sup> School of Physics and Technology, Center for Electron Microscopy and MOE Key Laboratory of  
Artificial Micro- and Nano-structures, Wuhan University, Wuhan 430072, China*

### **Supplemental Material Includes:**

Fig. S1

Fig. S2

Video S1

# 1. Supporting Figures Information

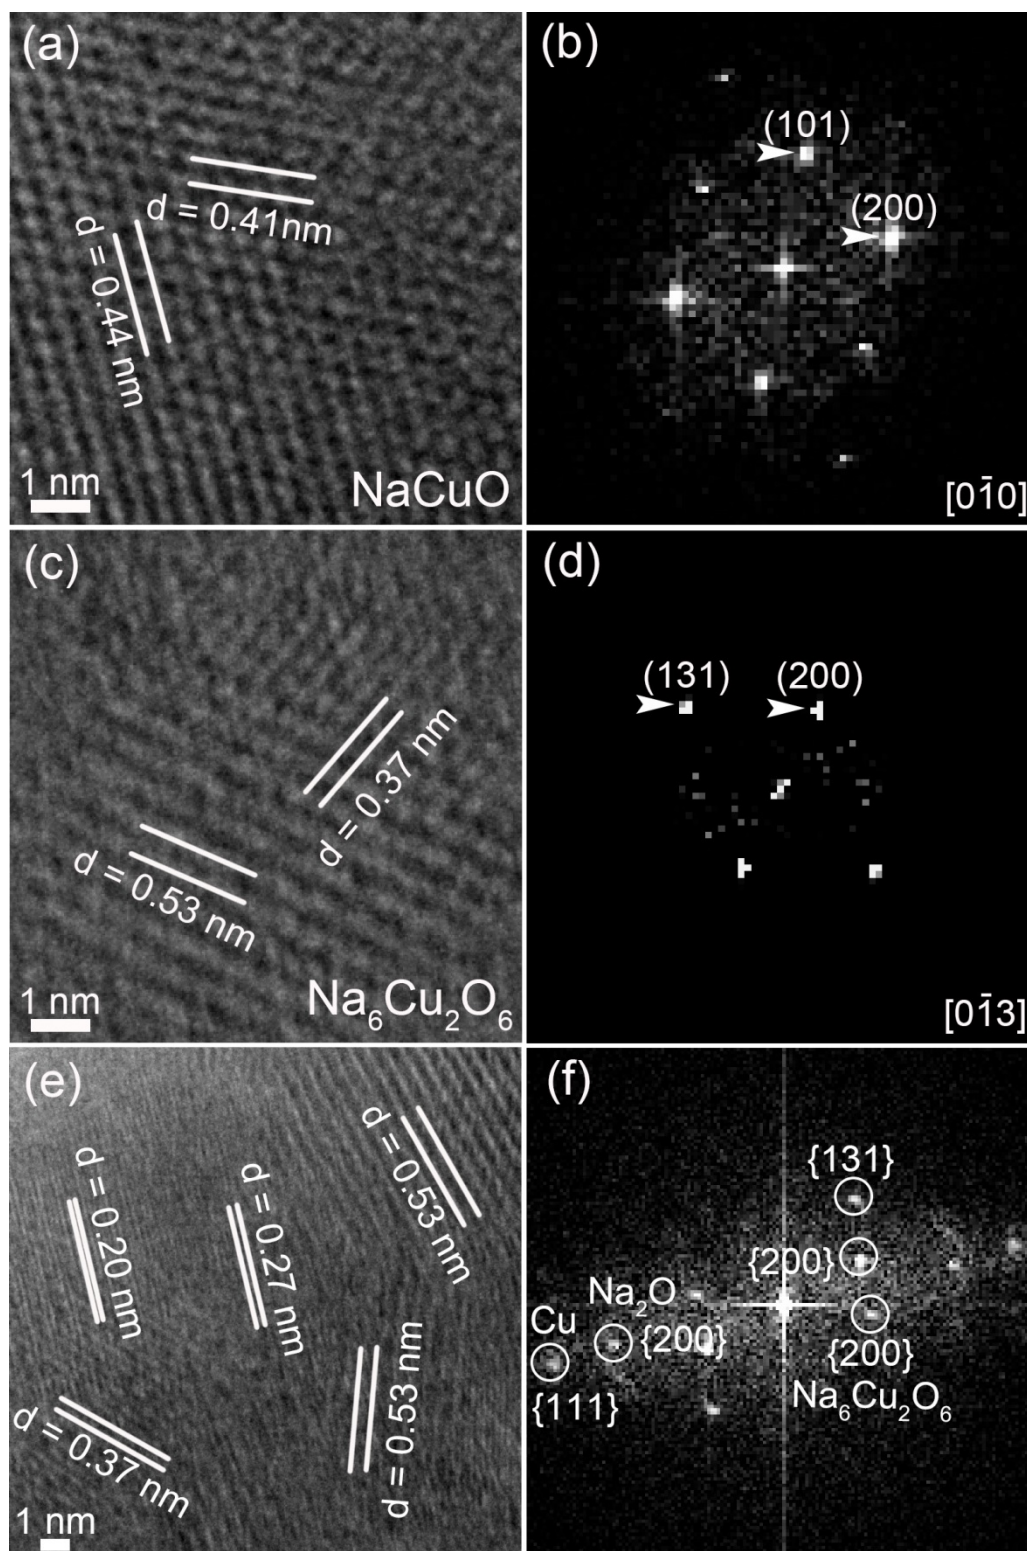

Fig. S1 (a, b) The TEM image and FFT pattern of a sodiated CuO NW during the second sodiation stage. (c-f) The TEM images and FFT patterns of different areas of a CuO NW during the third sodiation stage.

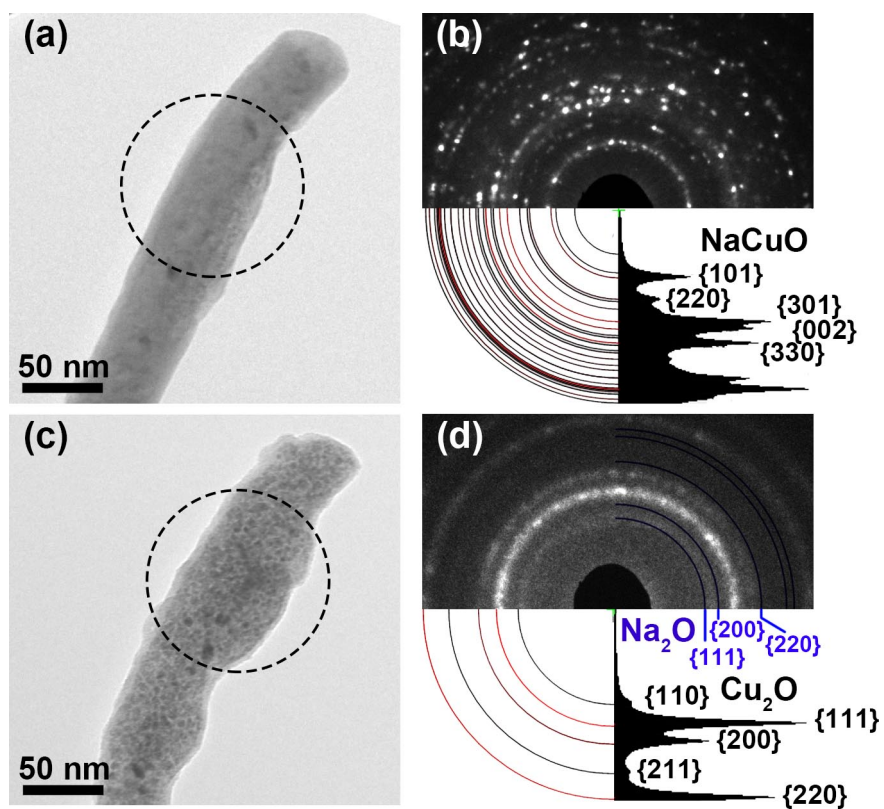

Fig. S2 (a, b) The TEM image and ED pattern of a sodiated CuO NW. (c, d) The TEM image and ED pattern of the same CuO NW after contacting with the atmosphere.

## **2. Supporting Movie Information**

Video S1. A typical *in situ* video presenting the morphology evolution of a CuO NW during first sodiation (applied voltage of -3 V).
